# Supplementary material
Source: Springer Nature journal article supplement (https://www.springermedizin.de/resource/supplementary/12885_2003_108_MOESM2_ESM.pdf/9468914)

migrating cells

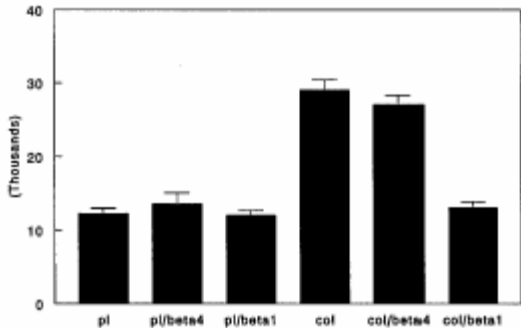

Supplement: MOESM2 [file 9468914]
